# Supplementary material
Source: PubMed Central journal article supplement (PMC3761303)
Supplement: 08e75d28cee2221ef5d43b36be0f5051_genetics.113.152983-4.pdf [file 08e75d28cee2221ef5d43b36be0f5051_genetics.113.152983-4.pdf]

## LITERATURE CITED

- Barton, N. H. and A. M. Etheridge, 2004. The effect of selection on genealogies. *Genetics* 166: 1115–1131.
- Charlesworth, B., 2012. The effects of deleterious mutations on evolution at linked sites. *Genetics* 190: 5–22.
- Charlesworth, B., M. Morgan, and D. Charlesworth, 1993. The effect of deleterious mutations on neutral molecular variation. *Genetics* 134(4): 1289.
- Hudson, R. and N. Kaplan, 1995. Deleterious background selection with recombination. *Genetics* 141: 1605–1617.
- O’Fallon, B., J. Seger, and F. Adler, 2010. A continuous-state coalescent and the impact of weak selection on the structure of gene genealogies. *Mol. Biol. Evol.* 27(5): 1162.
- Zeng, K. and B. Charlesworth, 2011. The joint effects of background selection and genetic recombination on local gene genealogies. *Genetics* 189(1): 251–266.
